# Supplementary material
Source: PubMed Central journal article supplement (PMC2662566)
Supplement: JCI37771sd.pdf [file JCI37771sd.pdf]

## Supporting information

### **Figure S1. SRF expression in patients with Lichen Planus or lichenification as a result of chronic eczematous dermatitis**

Immunohistochemical analysis of paraffin sections from lesional skin of patients with Lichen Planus (A-C) using the 2C5 antibody shows reduction in nuclear staining in affected areas compared to adjacent skin (A). The area of mildly affected skin indicated by the left arrow is shown at high magnification in (B) and the area of highly affected skin indicated by the right arrow is shown in (C). Staining of a section from affected skin of a patient with lichenification as a result of chronic eczematous dermatitis is shown in (D). Bars represent 200  $\mu\text{m}$  in (A) and 100  $\mu\text{m}$  in (B). epi: epidermis, d: dermis

### **Figure S2. K5Cre-mediated recombination at the R26R locus**

(A) Staining for  $\beta$ -galactosidase activity in a Rosa26R embryo (E14.5) expressing Cre recombinase under the control of the K5 promoter revealed activity in the epidermis. Staining of a complete embryo is shown in (A). (B) shows a longitudinal section of a K5CreRosa26R embryo (snout region) at E14.5. LacZ-staining is seen in the epidermis (epi, shown in (C) at higher magnification) and vibrissae (vb).

(B, C) Sections were counterstained with eosin; bar represents 50  $\mu\text{m}$  in (C).

**Figure S3. Embryonic lethality, edema formation and blistering in *Srf flex1/flex1* mice expressing the K5Cre transgene**

(A) Table showing the genotypes of *Srf*<sup>flex1/flex1</sup> x *Srf*<sup>wt/flex1</sup> K5Cre offspring at different stages of embryonic development and 4 weeks after birth (P28).

(B) Skin blistering (arrows) and hemorrhage of a *Srf*<sup>flex1/flex1</sup> K5Cre embryo at E14.5.

(C, D) Hematoxylin/eosin staining of cross sections of control and *Srf*<sup>flex1/flex1</sup> K5Cre embryos frequently revealed edema (C, E14.5, bar represents 200 μm) and occasionally subepidermal blisters (D, arrows, E15.5, bar represents 50 μm) in *Srf*<sup>flex1/flex1</sup> K5Cre embryos. epi: epidermis, d: dermis, ed: edema, sp: spinal cord.

**Figure S4. The inflammatory infiltrate of *Srf* mutant skin**

(A) An increased number of leukocytes was detected by ultrastructural analysis of skin lesions in *Srf* mutant mice. One asterisk indicates leukocytes, two asterisks indicate an endothelial cell (right panel). Arrows indicate the basement membrane. Bar represents 10 μm.

(B) Immunofluorescence analysis of skin sections for CD3 positive cells (lymphocytes), Meca-32 positive cells (endothelial cells) and MHCII positive cells in lesional skin of *Srf* mutant mice. The latter are predominantly macrophages as determined by staining for a macrophage-specific lectin. An increased number of mast cells in lesional *Srf* mutant skin was detected by

staining of skin sections with toluidine blue. Bar represents 50  $\mu\text{m}$ . d: dermis; epi: epidermis; hf: hair follicle.

**Figure S5. siRNA-mediated knock-down of SRF in primary keratinocytes does not affect apoptosis or expression of different keratins**

Western blot analysis showing expression of SRF, K5, K14, K10, cleaved caspase-3 and  $\beta$ -actin in primary human keratinocytes treated with scrambled or SRF siRNAs. siRNA against an unrelated protein (caspase-5) was used as an additional control. Lysates from keratinocytes that had been harvested 24h after irradiation with 50mJ/cm<sup>2</sup> UVB were used as a positive control for cleaved caspase-3 (indicated by an asterisk).

**Table S1. List of primary and secondary antibodies**

| Primary antibodies            | Host   | Catalog number | Source              |
|-------------------------------|--------|----------------|---------------------|
| anti-CD3                      | rabbit | A0452          | DAKO                |
| anti-cleaved caspase-3        | rabbit | #9661          | Cell Signaling      |
| anti-BrdU                     | mouse  | 1202693        | Roche               |
| anti-E-cadherin               | rat    | ALX-804-202    | Alexis Biochemicals |
| anti-E-cadherin               | mouse  | 610181         | BD Biosciences      |
| anti- $\gamma$ -catenin       | rabbit | Sc-7900        | Santa Cruz          |
| anti- $\beta$ -actin          | mouse  | A5441          | Sigma               |
| anti-GAPDH                    | mouse  | #5G4           | HyTest              |
| anti-integrin $\alpha$ 6-FITC | rat    | 555734         | BD Pharmingen       |
| anti-integrin $\beta$ 1       | rat    | MAB1997        | Chemicon            |
| anti-keratin 6                | rabbit | PRB-169P       | Covance             |
| anti-keratin 5 (AF-138)       | rabbit | PRB-160P       | Covance             |
| anti-keratin 10               | mouse  | M7002          | DAKO                |

|                                 |            |          |                                           |
|---------------------------------|------------|----------|-------------------------------------------|
| anti-keratin 14                 | rabbit     | PRB-155P | Covance                                   |
| anti-keratin 14                 | mouse      | MCA890   | Serotec                                   |
| anti-keratin 15                 | guinea pig | GP-CK15  | Progen                                    |
| anti-keratin 17                 | rabbit     | -        | P. Coulombe, (McGowan and Coulombe, 1998) |
| anti-keratins 8/18              | guinea pig | 03-GP11  | American Research Products                |
| anti-loricrin                   | rabbit     | PRB-145P | Covance                                   |
| anti-macrophage specific lectin | rat        | ab 15635 | Abcam                                     |
| anti-Meca-32                    | rat        | 553849   | BD Pharmingen                             |
| anti-MHC class II               | rat        | T-2106   | BMA Biomedicals                           |
| anti-p63                        | mouse      | sc-8431  | Santa Cruz                                |
| anti-SRF                        | rat        | -        | clone 2C5, this study                     |
| anti-phospho-STAT3              | rabbit     | #9131    | Cell Signaling                            |

### **Secondary antibodies**

|                        |        |              |                     |
|------------------------|--------|--------------|---------------------|
| anti-guinea pig biotin | goat   | #106-065-003 | Jackson             |
| anti-rabbit biotin     | goat   | #111-065-003 | Jackson             |
| anti-rabbit-Cy2        | goat   | #111-225-003 | Jackson             |
| anti-rabbit HRP        | goat   | W4011        | Promega             |
| anti-rat AP            | goat   | S383A        | Promega             |
| anti-rat biotin        | goat   | #112-065-003 | Jackson             |
| anti-rat Cy2           | goat   | #112-225-003 | Jackson             |
| anti-rat Cy3           | donkey | #712-165-150 | Jackson             |
| anti-rat HRP           | goat   | NA935        | GE Healthcare       |
| anti-mouse biotin      | goat   | BA-9200      | Vector Laboratories |
| anti-mouse HRP         | goat   | W4021        | Promega             |
| anti-mouse Cy2         | goat   | #115-225-003 | Jackson             |

## **Supplementary Methods**

### **Preparation of protein lysates and Western blot analysis**

Tissue or cells were lysed in lysis buffer containing 50 mM Tris/HCl pH 7.4, 150 mM NaCl, 1 mM ethylenediaminetetraacetic acid (EDTA), 1% NP-40, 0.5 mM AEBSF, 10 µg/ml aprotinin, 10 µg/ml leupeptin, 10 µg/ml pepstatin, 10 mM NaF, 1 mM Na<sub>3</sub>VO<sub>4</sub>, 10 mM Na<sub>4</sub>P<sub>2</sub>O<sub>7</sub>, 20 µM phenylarsinoxide as well as phosphatase inhibitor cocktails I and II (Sigma). For analysis of keratin expression cells were lysed in Laemmli buffer. Proteins were separated by sodium dodecylsulfate polyacrylamide (SDS) gel electrophoresis under reducing conditions and transferred to nitrocellulose membrane. Blotted membranes were blocked in 3% non-fat dry milk in PBS/0.1% Tween 20 and incubated with primary antibodies (see above) overnight at 4 °C. Proteins were visualized with horseradish peroxidase-coupled anti-mouse-, anti-rabbit- or anti-rat IgG antibodies, followed by enhanced chemoluminescence detection (ECL). Alternatively, visualization was achieved with an alkaline phosphatase-coupled secondary antibody followed by incubation with the AP substrate 5-bromo-4-chloro-3-indolyl phosphate (BCIP) and nitro blue tetrazolium (NBT).

### **Histology, immunostaining and TUNEL assay**

For routine histology, cryo- or paraffin-embedded sections (7 µm) were stained with hematoxylin and eosin. For immunohistochemical analysis, cultured cells or sections (subjected to antigen retrieval where necessary) were stained according to standard protocols and images were taken with a Zeiss Axiophot microscope or a confocal Leica TCS NT SP1 microscope. All primary and secondary antibodies used are listed in the Supplementary Table S1. The polyclonal antibody against keratin 17 was kindly provided by Dr.

Pierre Coulombe, Johns Hopkins University, Baltimore, MA. For the detection of proliferating cells by BrdU labeling, mice were injected intraperitoneally with BrdU (250 mg/kg BrdU in 0.9% NaCl) and sacrificed 2 hours after injection. Acidic ethanol-fixed skin sections were incubated with a monoclonal antibody directed against BrdU (Roche), followed by a Cy2-conjugated anti-mouse antibody.

TUNEL assays were performed according to the manufacturer's manual (Roche) using 3.5 $\mu$ m paraffin sections of tissue that had been fixed in 4% paraformaldehyde in PBS.

### **RNA isolation and quantitative RT-PCR analysis**

Total cellular RNA from skin and primary keratinocytes was isolated as described [1], including a DNase digest. RNA (1  $\mu$ g) was reverse-transcribed using the iScript<sup>TM</sup> cDNA Synthesis Kit (Bio-Rad). The reaction mix was filled up with water to 50  $\mu$ l, and 0.5  $\mu$ l were used for quantitative RT-PCR, using 10 nM primers and 2x Light Cycler 480 SYBR green I mix (Roche) in a 25  $\mu$ l reaction volume. The reaction was followed and evaluated in the Light Cycler 480 (Roche). Amplification of the GAPDH cDNA was used for normalization. The following primers were used: Gapdh: 5'- TCG TGG ATC TGA CGT GCC GCC TG, 3'- CAC CAC CCT GTT GCT GTA GCC GTA T; IL1 $\beta$ : 5'- CTGAAAGCTCTCCACCTC, 3'- TGCTGATGTACCAGTT GGGG; S100A8: 5'- GCCGTCTGAACTGGAGAAG, 3'- GTGAGATGCCACAC CCACTTT; S100A9: 5'- CGCAGCATAACCACCATCAT, 3'- AAGATCAACTT TGCCATCAGC, Srf: 5'- TGTGCAGGCCATTCATGTG, 3'- ACAGACGACG TCATGATGGTG.

1. Chomczynski, P., and Sacchi, N. 1987. Single-step method of RNA isolation by acid guanidinium thiocyanate-phenol-chloroform extraction. *Anal Biochem* **162**:156-159.

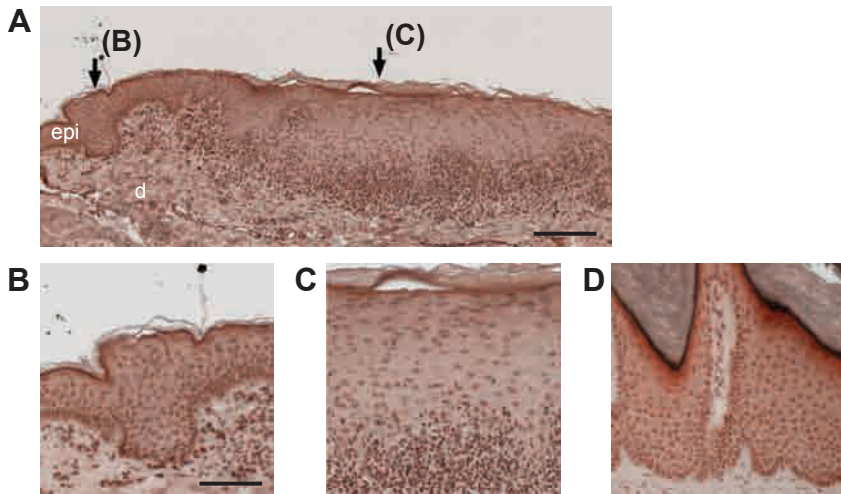

**Figure S1. SRF expression in patients with Lichen Planus or lichenification as a result of chronic eczematous dermatitis**

Immunohistochemical analysis of paraffin sections from lesional skin of patients with Lichen Planus (A-C) using the 2C5 antibody shows reduction in nuclear staining in affected areas compared to adjacent skin (A). The area of mildly affected skin indicated by the left arrow is shown at high magnification in (B) and the area of highly affected skin indicated by the right arrow is shown in (C). Staining of a section from affected skin of a patient with lichenification as a result of chronic eczematous dermatitis is shown in (D). Bars represent 200  $\mu\text{m}$  in (A) and 100  $\mu\text{m}$  in (B). epi: epidermis, d: dermis



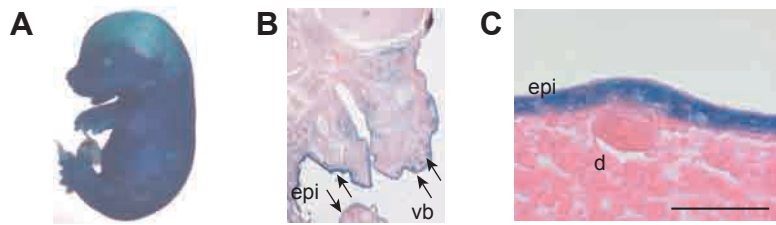

**Figure S2. K5Cre-mediated recombination at the R26R locus.**

(A) Staining for b-gal activity in a Rosa26R embryo (E14.5) expressing Cre recombinase under the control of the K5 promoter revealed activity in the epidermis. Staining of a complete embryo is shown in (A).

(B) shows a longitudinal section of a K5CreRosa26R embryo (snout region) at E14.5.

LacZ-staining is seen in the epidermis (epi, shown in (C) at higher magnification) and vibrissae (vb).

(B, C) Sections were counterstained with eosin; bar represents 50  $\mu$ m in (C).

| A     | total | <i>Srf</i> <sup>wt/flex1</sup> | <i>Srf</i> <sup>wt/flex1</sup><br><i>K5Cre</i> | <i>Srf</i> <sup>flex1/flex1</sup> | <i>Srf</i> <sup>flex1/flex1</sup><br><i>K5Cre</i> |
|-------|-------|--------------------------------|------------------------------------------------|-----------------------------------|---------------------------------------------------|
| E14.5 | 38    | 11                             | 9                                              | 8                                 | 7                                                 |
| E15.5 | 30    | 8                              | 12                                             | 5                                 | 5                                                 |
| E16.5 | 12    | 3                              | 6                                              | 2                                 | 1                                                 |
| E17.5 | 5     | 1                              | 4                                              | 0                                 | 0                                                 |
| P28   | 51    | 15                             | 22                                             | 14                                | 0                                                 |

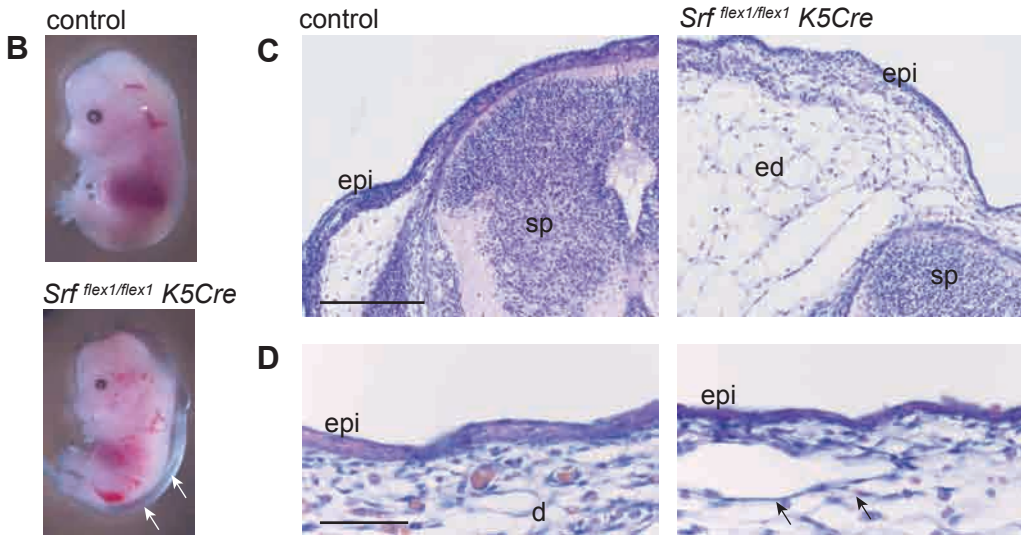

**Figure S3. Embryonic lethality, edema formation and blistering in *Srf flex1/flex1* mice expressing the *K5Cre* transgene**

(A) Table showing the genotypes of *Srf flex1/flex1* x *Srf wt/flex1 K5Cre* offspring at different stages of embryonic development and 4 weeks after birth (P28).

(B) Skin blistering (arrows) and hemorrhage of a *Srf flex1/flex1 K5Cre* embryo at E14.5.

(C, D) Hematoxylin/eosin staining of cross sections of control and *Srf flex1/flex1 K5Cre* embryos frequently revealed edema (C, E14.5, bar represents 200  $\mu$ m) and occasionally subepidermal blisters (D, arrows, E15.5, bar represents 50  $\mu$ m) in *Srf flex1/flex1 K5Cre* embryos. epi: epidermis, d: dermis, ed: edema, sp: spinal cord.

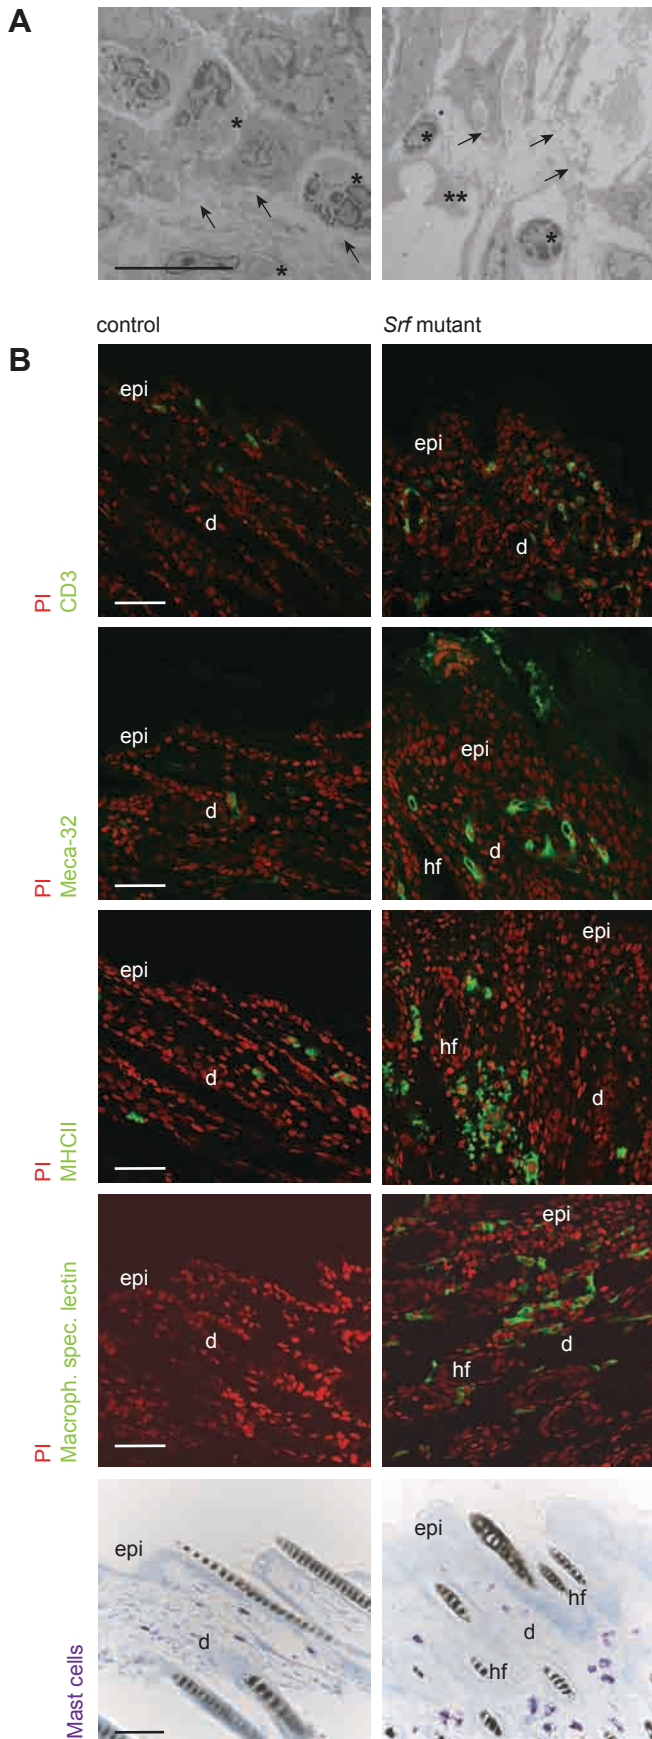

**Figure S4. The inflammatory infiltrate of *Srf* mutant skin**

(A) An increased number of leukocytes was detected by ultrastructural analysis of skin lesions in *Srf* mutant mice. One asterisk indicates leukocytes, two asterisks indicate an endothelial cell (right panel). Arrows indicate the basement membrane. Bar represents 10  $\mu$ m.

(B) Immunofluorescence analysis of skin sections for CD3 positive cells (lymphocytes), Meca-32 positive cells (endothelial cells) and MHCII positive cells in lesional skin of *Srf* mutant mice. The latter are predominantly macrophages as determined by staining for a macrophage-specific lectin. An increased number of mast cells in lesional *Srf* mutant skin was detected by staining of skin sections with toluidine blue. Bar represents 50  $\mu$ m; epi: epidermis; hf: hair follicle.

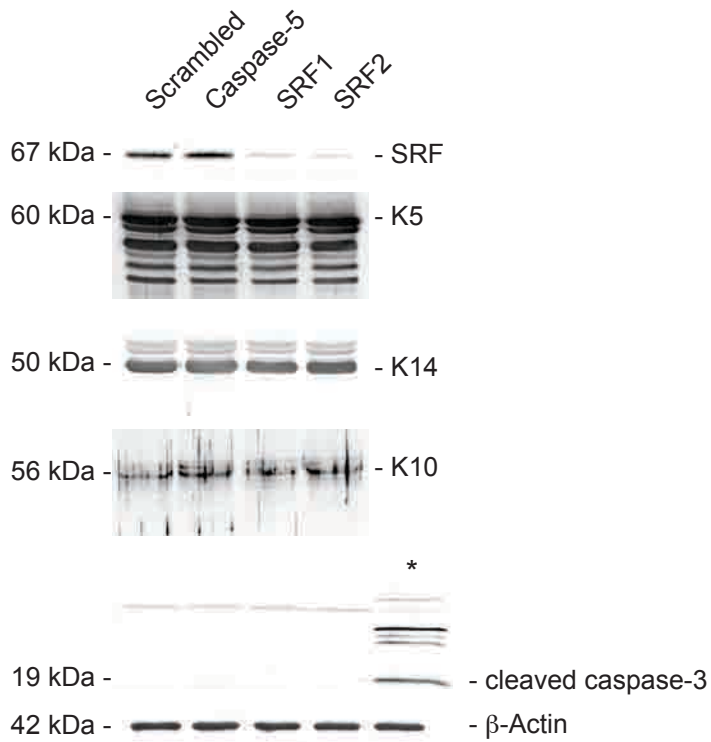

**Figure S5. siRNA-mediated knock-down of SRF in primary keratinocytes does not affect apoptosis or expression of different keratins**

Western blot analysis showing expression of SRF, K5, K14, K10, cleaved caspase-3 and  $\beta$ -actin in primary human keratinocytes treated with scrambled or SRF siRNAs. siRNA against an unrelated protein (caspase-5) was used as an additional control. Lysates from keratinocytes that had been harvested 24h after irradiation with 50mJ/cm<sup>2</sup> UVB were used as a positive control for cleaved caspase-3 (indicated by an asterisk).
